# Supplementary material for: Electrochemical oscillation during galvanostatic charging and discharging of Zr-modified Li4Ti5O12 in Li-ion batteries
Source: Royal Society of Chemistry journal article supplement (doi:10.1039/d4ra03331k), 2024-01-01
Supplement: d4ra03331k1.pdf [file d4ra03331k1.pdf]

## Supporting Information

### **Electrochemical Oscillation during Galvanostatic Charging and Discharging of Zr-modified $\text{Li}_4\text{Ti}_5\text{O}_{12}$ in Li-Ion Batteries**

Yijin Sheng,<sup>a,†</sup> Fangxu Hu,<sup>a,†</sup> Yu Wu,<sup>a</sup> De Li,<sup>a,c,\*</sup> Wenting Ji<sup>a,\*</sup> and Yong Chen<sup>b,\*</sup>

<sup>a</sup> State Key Laboratory of Marine Resources Utilization in South China Sea, Key Laboratory of Research on Utilization of Si-Zr-Ti Resources of Hainan Province, School of Materials Science and Engineering, Hainan University, Haikou 570228, China.

<sup>b</sup> Guangdong Key Laboratory for Hydrogen Energy Technologies; School of Materials Science and Hydrogen Energy, Foshan University, Foshan, 528000, China.

<sup>c</sup> National Laboratory of Solid State Microstructures, Nanjing University, Nanjing 210093, China.

<sup>†</sup>Y.S. and F.H. contributed equally to this work.

\* E-mail: lidenju@sina.com; jwt0316@163.com; ychen2002@163.com

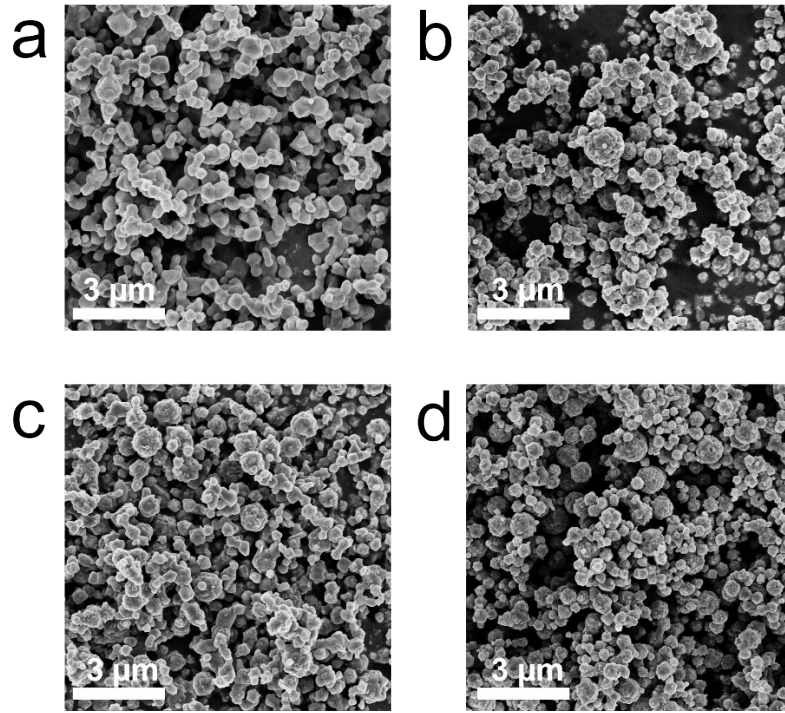

**Figure S1.** The SEM images of  $\text{Li}_{4.4}\text{Ti}_5\text{O}_{12}$  (a),  $\text{Li}_{4.4}\text{Ti}_{4.75}\text{Zr}_{0.25}\text{O}_{12}$  (b),  $\text{Li}_{4.4}\text{Ti}_{4.5}\text{Zr}_{0.5}\text{O}_{12}$  (c) and  $\text{Li}_{4.4}\text{Ti}_{4.25}\text{Zr}_{0.75}\text{O}_{12}$  (d) with an element ratio of Li:Ti:Zr=4.4:5:0, 4.4:4.75:0.25, 4.4:4.5:0.5 and 4.4:4.25:0.75 in the raw materials, respectively, which are sintered at 800 °C in air for 8 h.

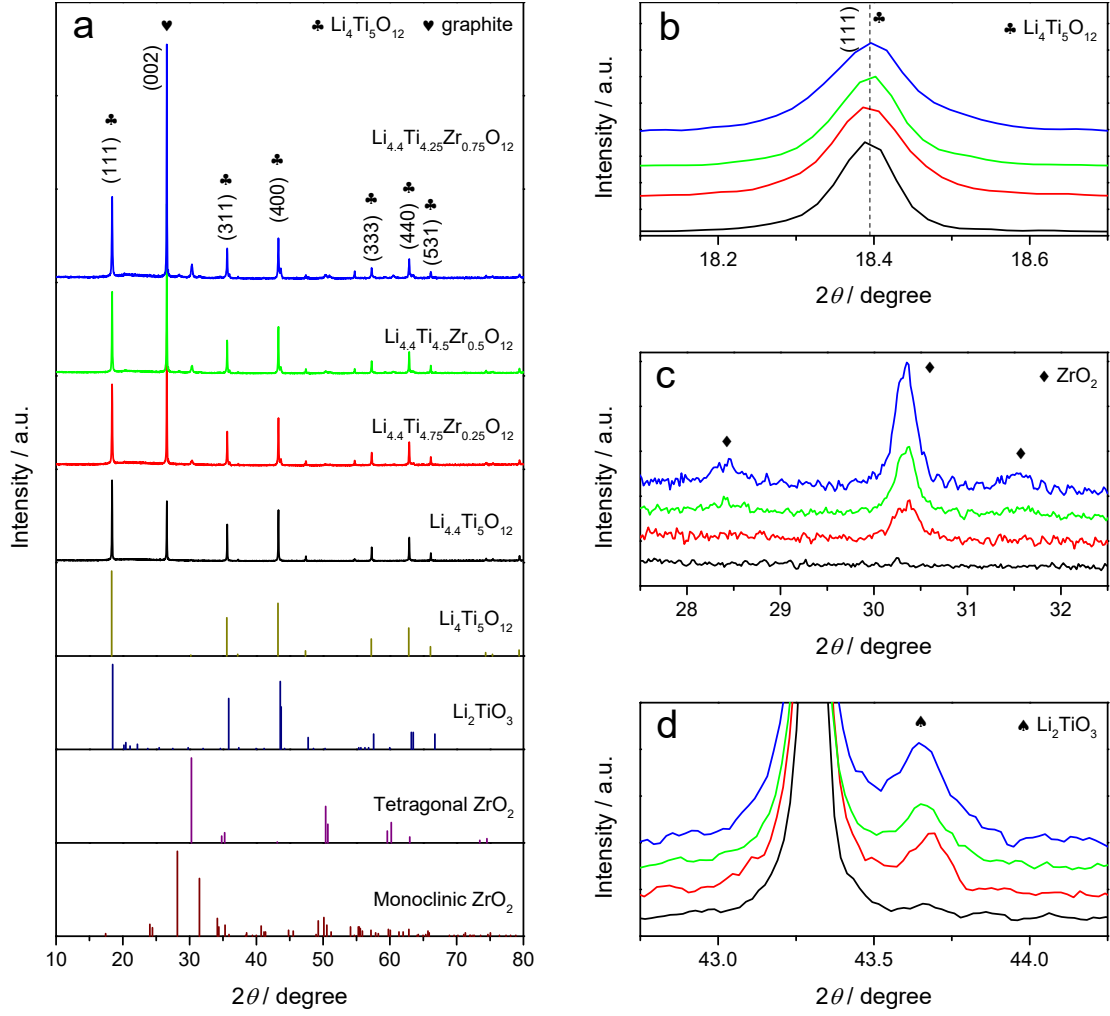

**Figure S2.** (a) The XRD patterns of  $\text{Li}_{4.4}\text{Ti}_5\text{O}_{12}$  (black),  $\text{Li}_{4.4}\text{Ti}_{4.75}\text{Zr}_{0.25}\text{O}_{12}$  (red),  $\text{Li}_{4.4}\text{Ti}_{4.5}\text{Zr}_{0.5}\text{O}_{12}$  (green) and  $\text{Li}_{4.4}\text{Ti}_{4.25}\text{Zr}_{0.75}\text{O}_{12}$  (blue), and the enlarged XRD peaks for  $\text{Li}_4\text{Ti}_5\text{O}_{12}$  (b),  $\text{ZrO}_2$  (c) and  $\text{Li}_2\text{TiO}_3$  (d) phases. Here, all XRD patterns are calibrated by the (002) peak of graphite.

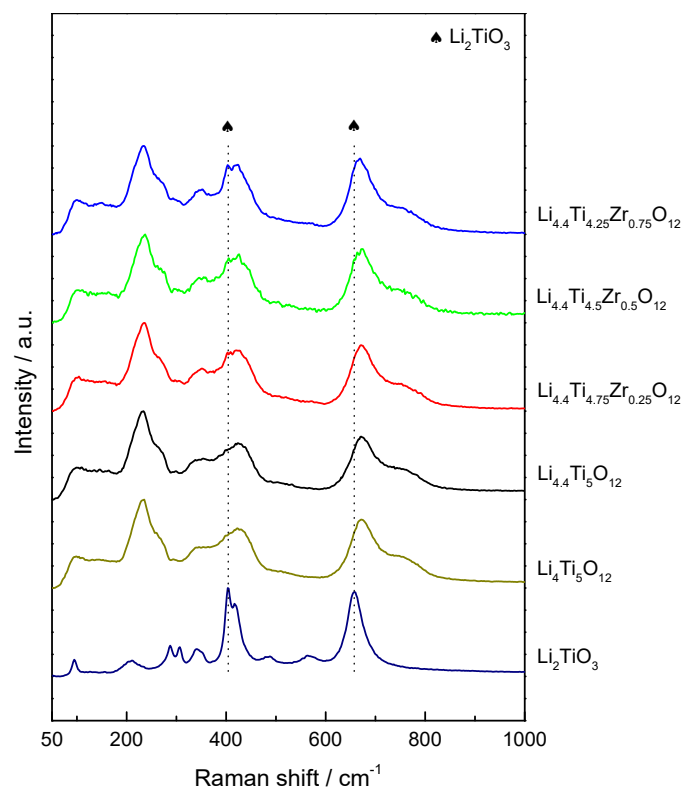

**Figure S3.** The Raman spectra of  $\text{Li}_{4.4}\text{Ti}_5\text{O}_{12}$  (black),  $\text{Li}_{4.4}\text{Ti}_{4.75}\text{Zr}_{0.25}\text{O}_{12}$  (red),  $\text{Li}_{4.4}\text{Ti}_{4.5}\text{Zr}_{0.5}\text{O}_{12}$  (green) and  $\text{Li}_{4.4}\text{Ti}_{4.25}\text{Zr}_{0.75}\text{O}_{12}$  (blue), as well as the Raman spectra of  $\text{Li}_4\text{Ti}_5\text{O}_{12}$  (dark yellow) and  $\text{Li}_2\text{TiO}_3$  (navy) phases for comparison.

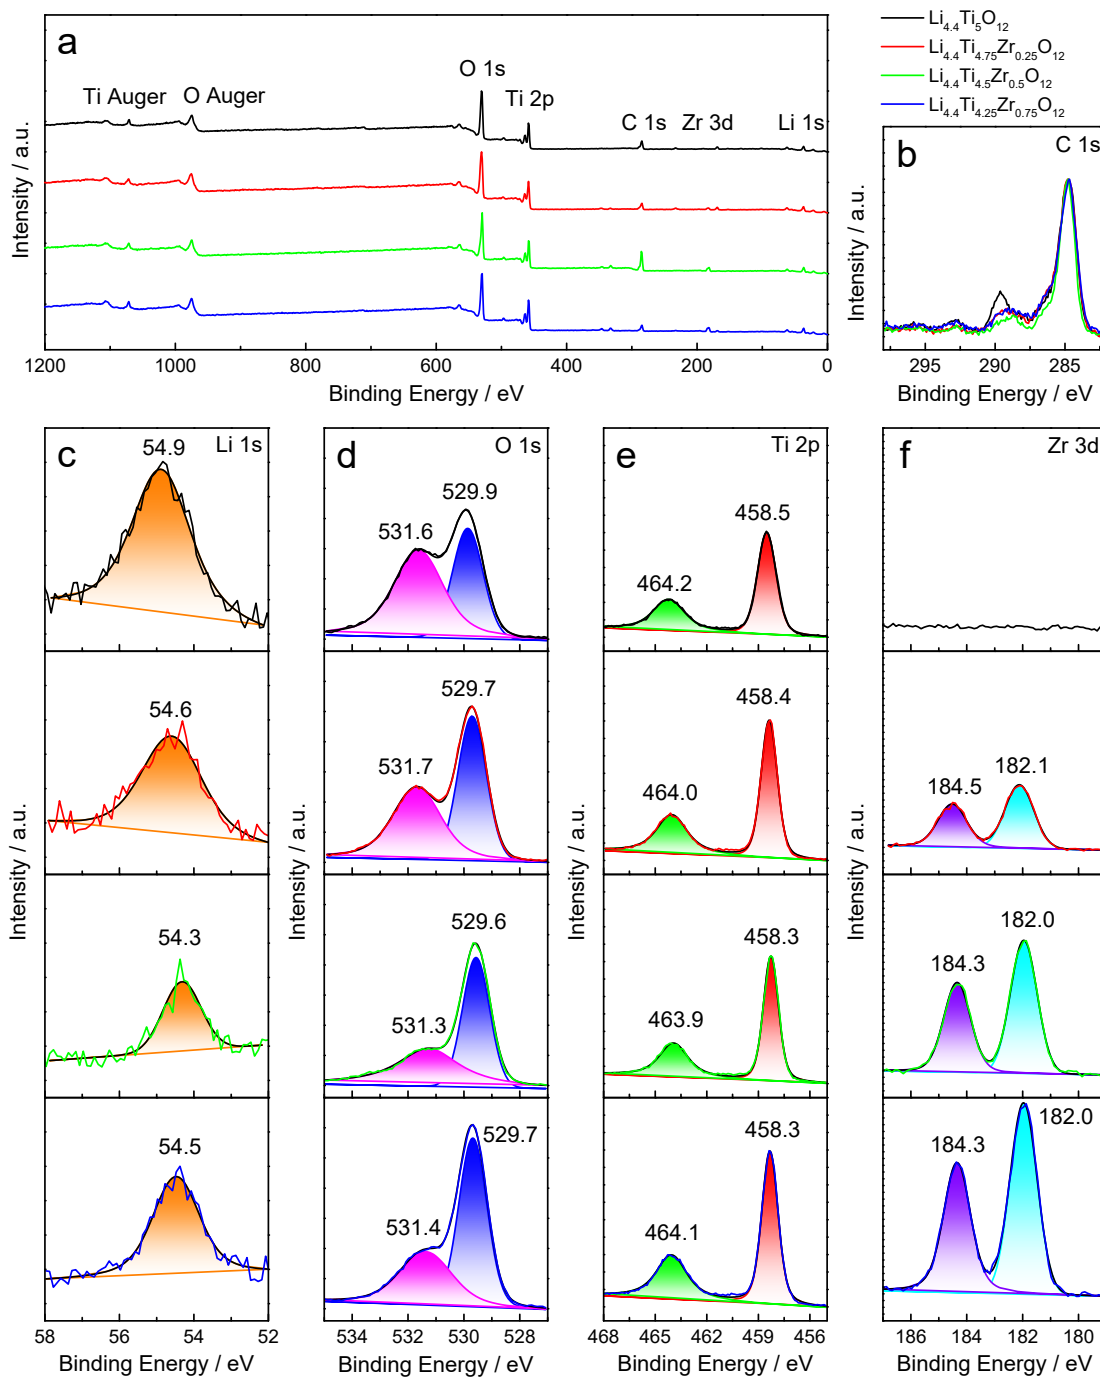

**Figure S4.** The measured and fitted XPS spectra of  $\text{Li}_{4.4}\text{Ti}_5\text{O}_{12}$  (black),  $\text{Li}_{4.4}\text{Ti}_{4.75}\text{Zr}_{0.25}\text{O}_{12}$  (red),  $\text{Li}_{4.4}\text{Ti}_{4.5}\text{Zr}_{0.5}\text{O}_{12}$  (green) and  $\text{Li}_{4.4}\text{Ti}_{4.25}\text{Zr}_{0.75}\text{O}_{12}$  (blue): (a) survey, (b) C 1s, (c) Li 1s, (d) O 1s, (e) Ti 2p and (f) Zr 3d.

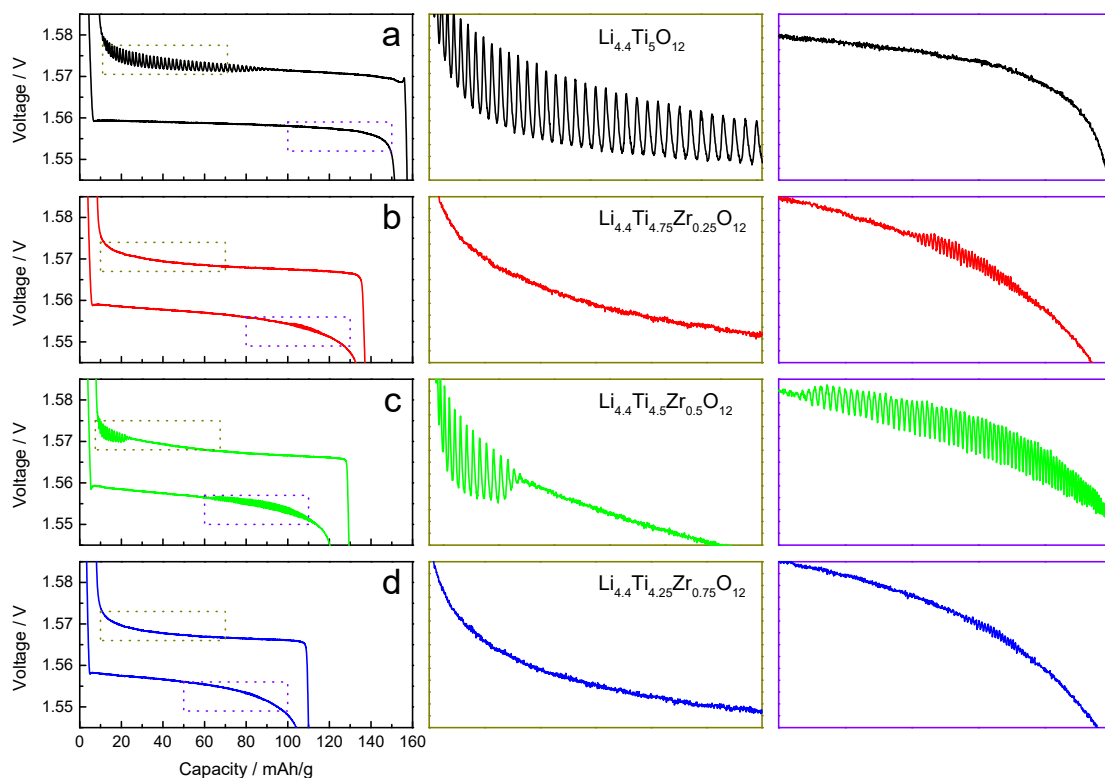

**Figure S5.** The discharge and charge curves of  $\text{Li}_{4.4}\text{Ti}_5\text{O}_{12}$  (a),  $\text{Li}_{4.4}\text{Ti}_{4.75}\text{Zr}_{0.25}\text{O}_{12}$  (b),  $\text{Li}_{4.4}\text{Ti}_{4.5}\text{Zr}_{0.5}\text{O}_{12}$  (c) and  $\text{Li}_{4.4}\text{Ti}_{4.25}\text{Zr}_{0.75}\text{O}_{12}$  (d) with a voltage range of 1.2–2.0 V vs.  $\text{Li}^+/\text{Li}$  and a current rate of 0.1 C, and the middle and right insets show the corresponding enlarged views in the end of charge and discharge plateaus, respectively.

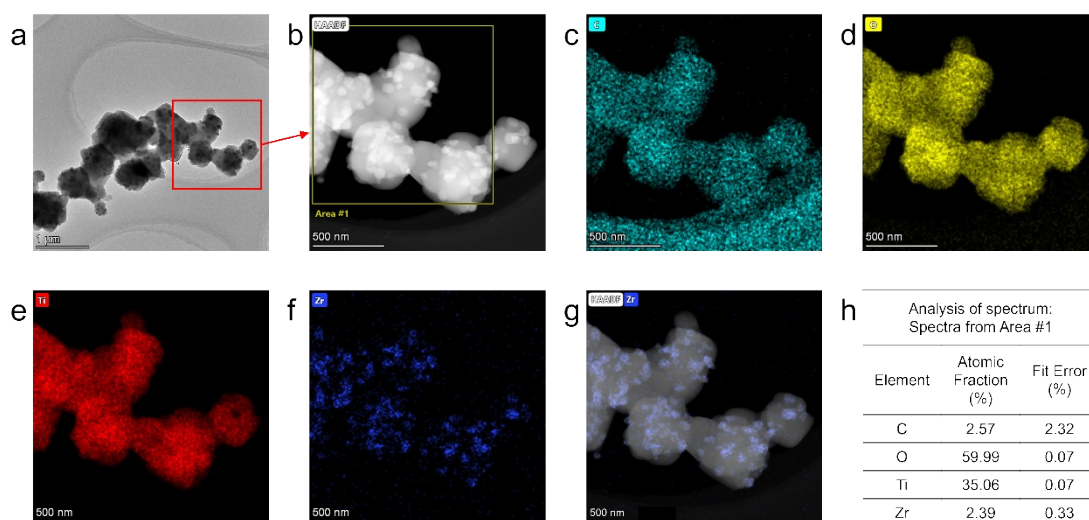

**Figure S6.** (a) The STEM image of  $\text{Li}_{4.4}\text{Ti}_{4.5}\text{Zr}_{0.5}\text{O}_{12}$ , the enlarged HAADF-STEM image (b) and the corresponding EDX maps of C (c), O (d), Ti (e), Zr (f), Zr overlapping the HAADF-STEM image (g) and element analysis of spectrum (h).

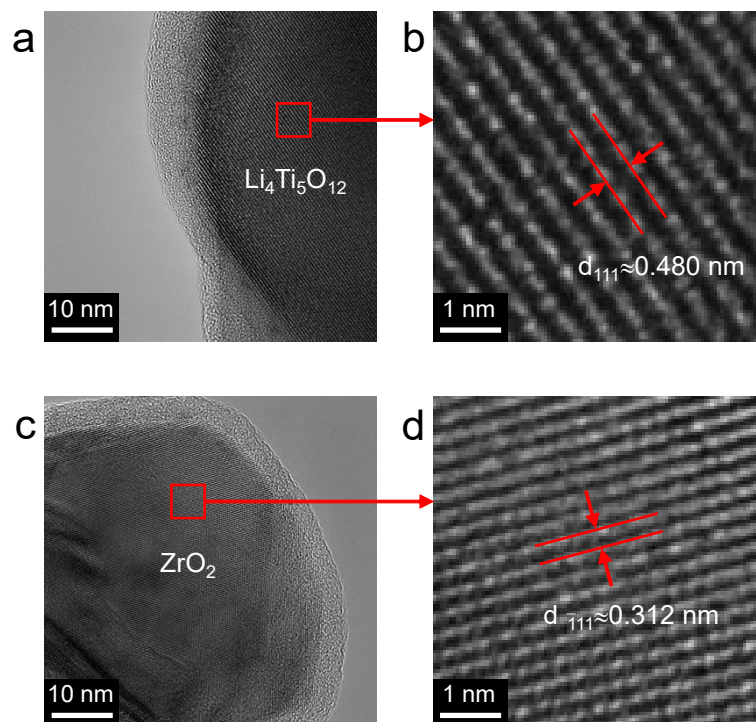

**Figure S7.** The high-resolution STEM images of  $\text{Li}_{4.4}\text{Ti}_{4.5}\text{Zr}_{0.5}\text{O}_{12}$  for the  $\text{Li}_4\text{Ti}_5\text{O}_{12}$  phase (a, b) and the  $\text{ZrO}_2$  phase (c, d).

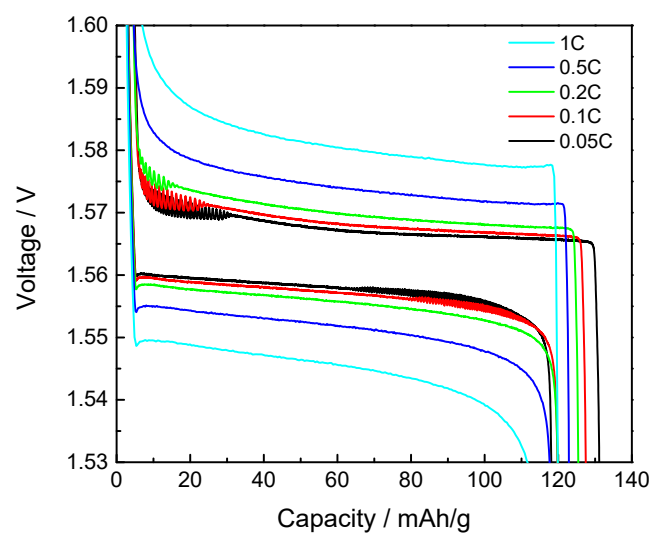

**Figure S8.** The discharge and charge curves of  $\text{Li}_{4.4}\text{Ti}_{4.5}\text{Zr}_{0.5}\text{O}_{12}$  at different rates of 1C, 0.5C, 0.2C, 0.1C and 0.05C.

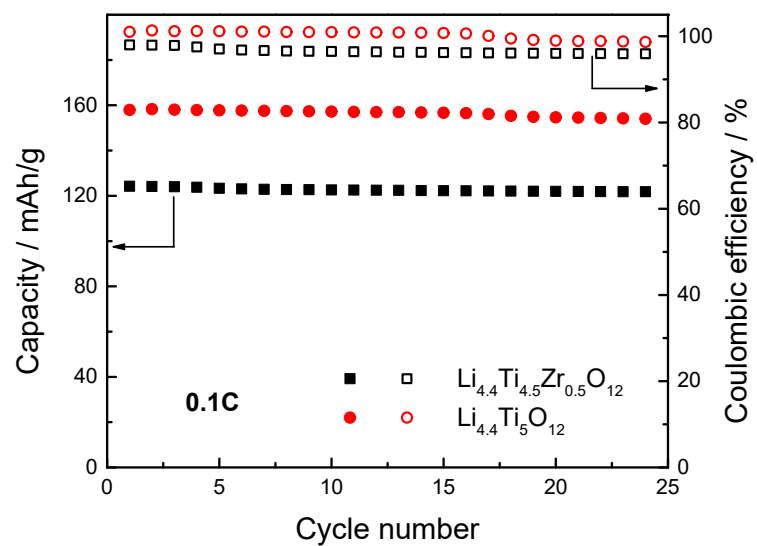

**Figure S9.** The Cycle performance of  $\text{Li}_{4.4}\text{Ti}_5\text{O}_{12}$  and  $\text{Li}_{4.4}\text{Ti}_{4.5}\text{Zr}_{0.5}\text{O}_{12}$  with a voltage range of 1.2–2.0 V vs.  $\text{Li}^+/\text{Li}$  and a current rate of 0.1 C.

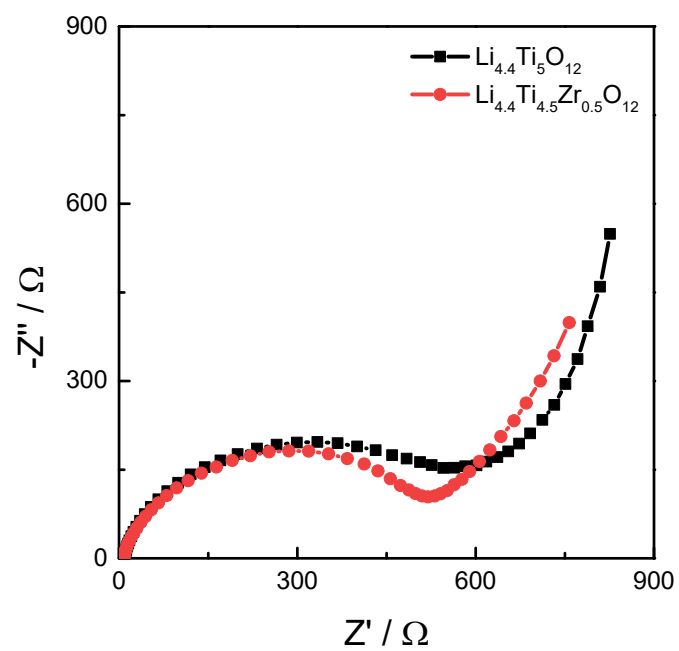

**Figure S10.** Nyquist plots of EIS spectra for  $\text{Li}_{4.4}\text{Ti}_5\text{O}_{12}$  and  $\text{Li}_{4.4}\text{Ti}_{4.5}\text{Zr}_{0.5}\text{O}_{12}$ .
